# Supplementary material
Source: PubMed Central journal article supplement (PMC10870731)

Supplemental Figure 1. Distributions of all methylated DNA markers tested for colorectal cancers and controls, stratified by Lynch syndrome. Log10 strand counts are adjusted based on the level of the control gene, ACTB, in all controls (SPOR-CRC-CTRL and LS-CRC-CTRL). P-value provided to show statistical significance of difference of medians between CASE and CTRL samples within SPOR and LS subgroups.

### NDRG4

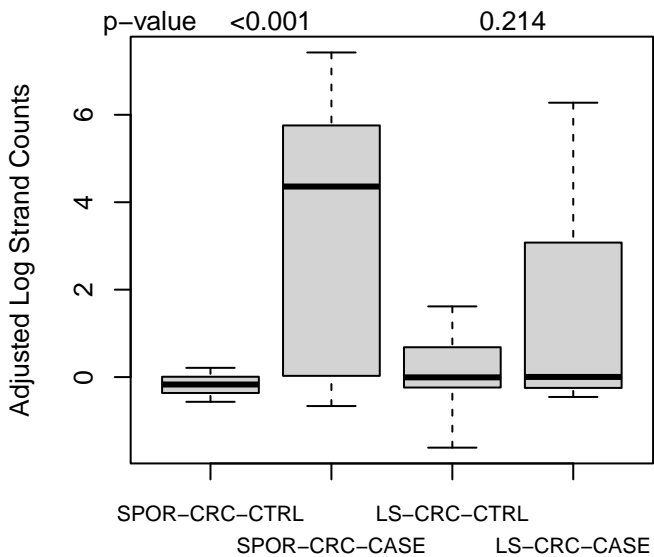

### BMP3

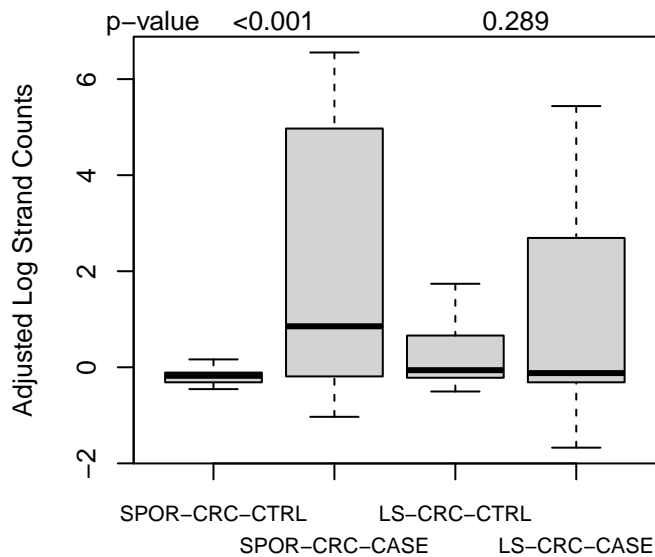

### LASS4

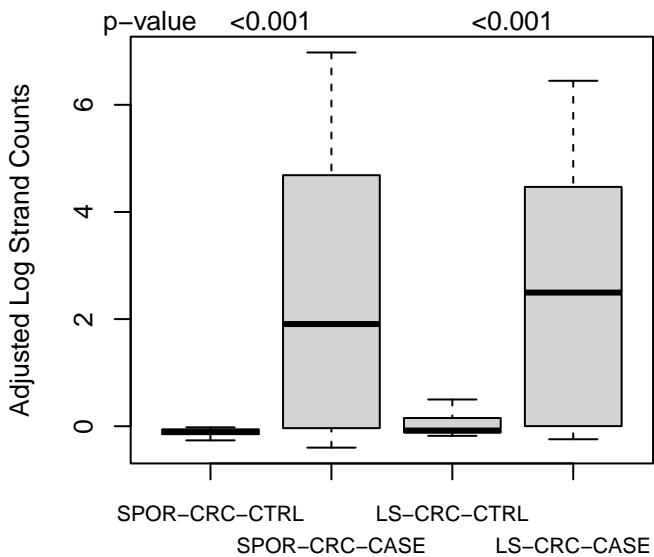

### LRRC4

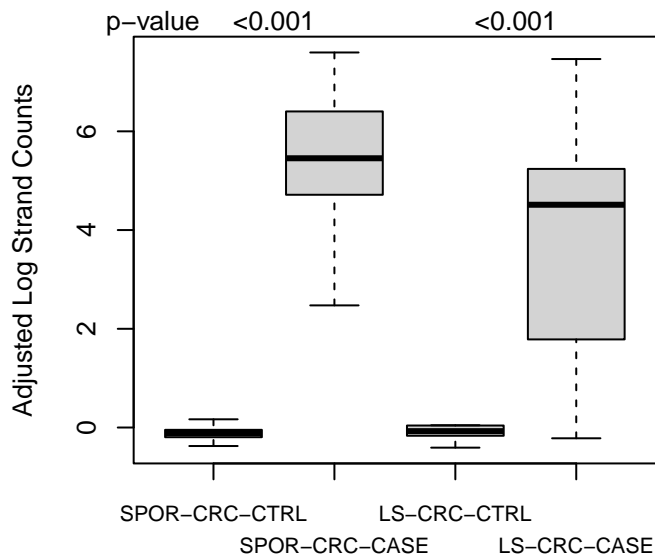

### PPP2R5C

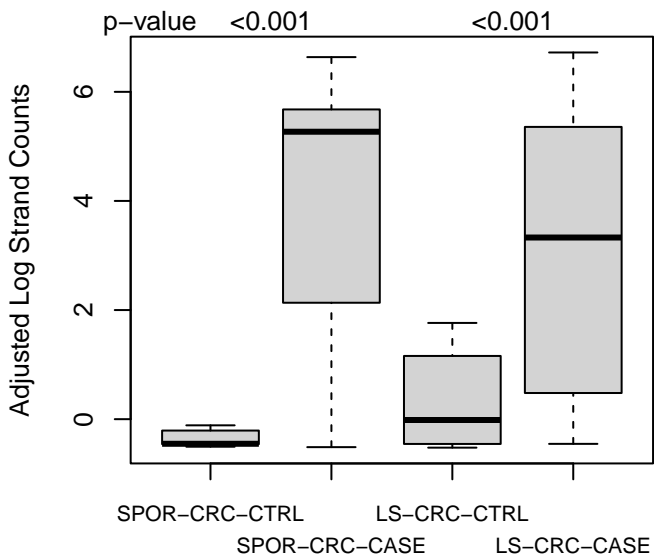

### USP44

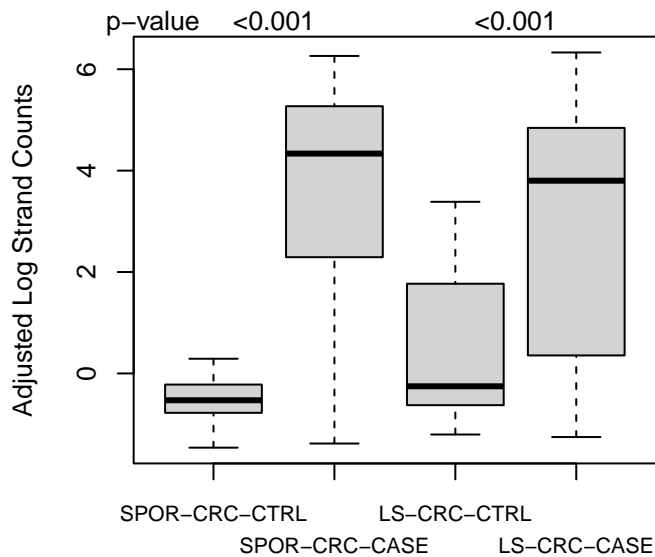

### STK32B

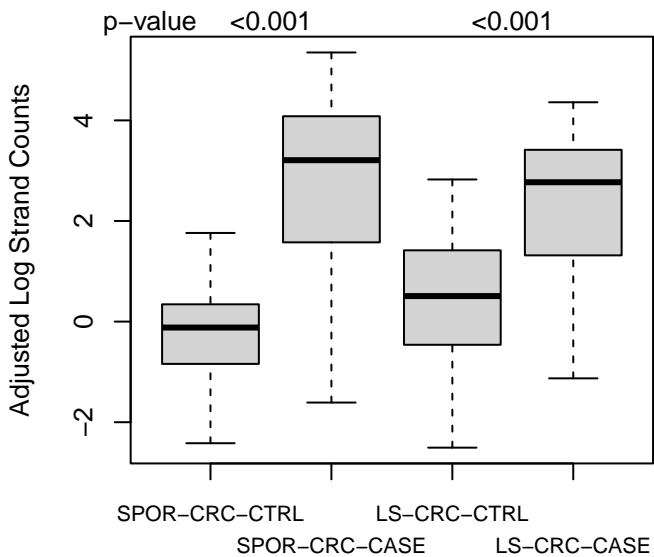

### CBLN2

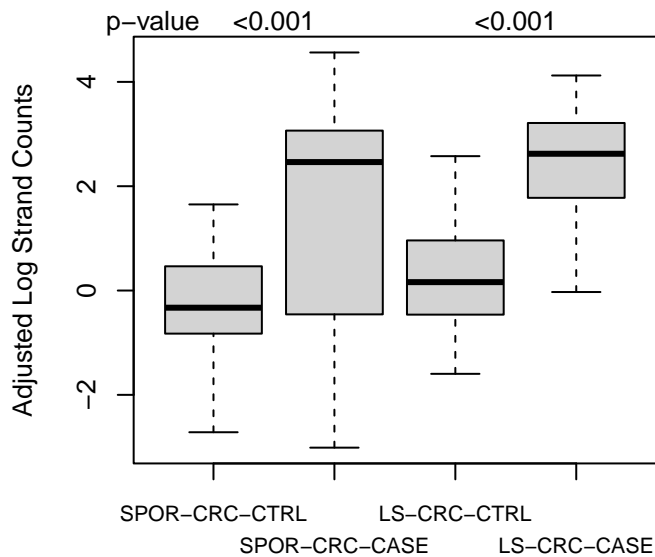

### ADCY4

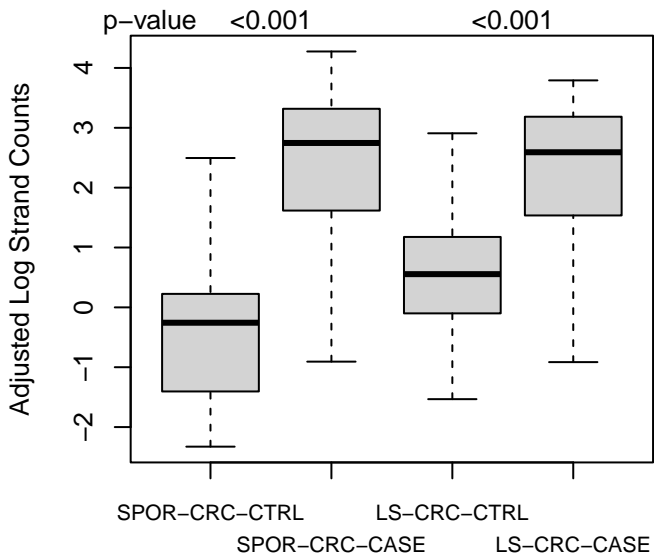

### CNTFR

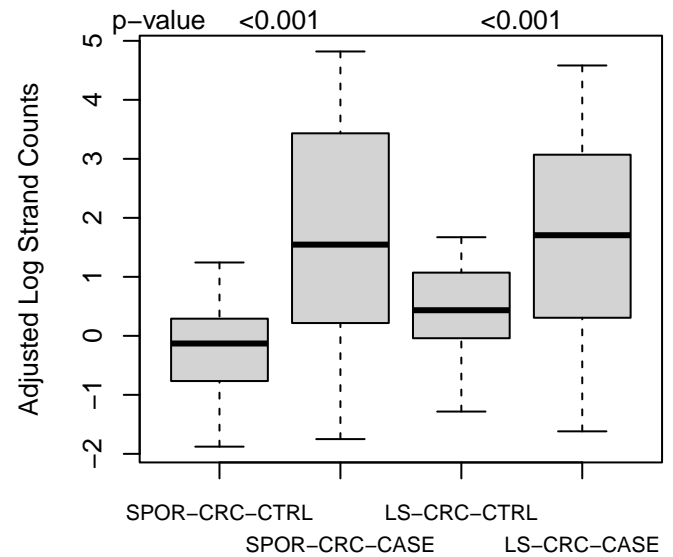

### PITX1

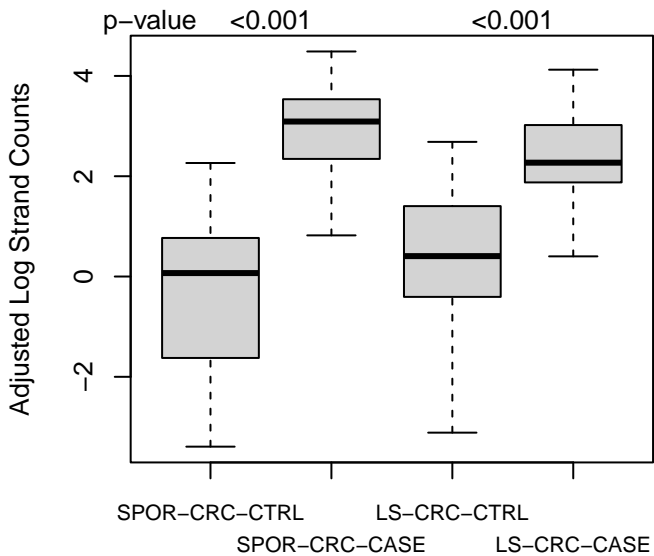

### ANTXR1

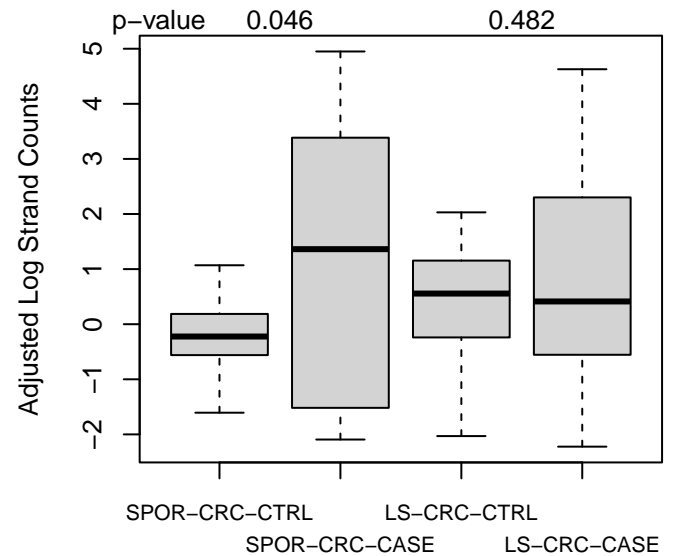

### ALKBH5

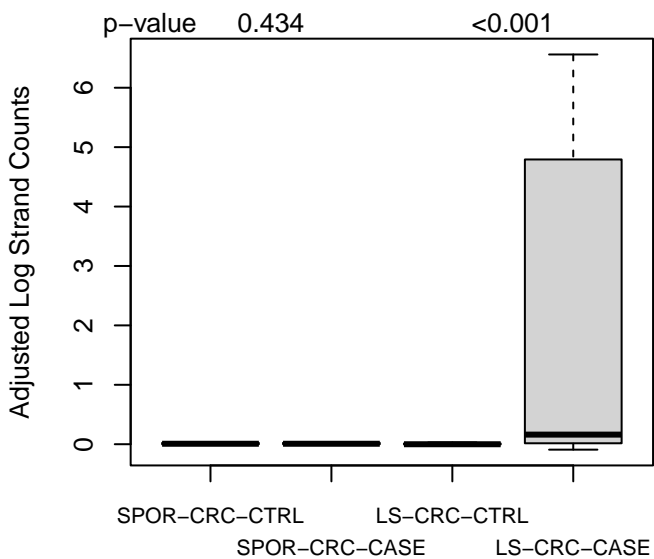

### ADM

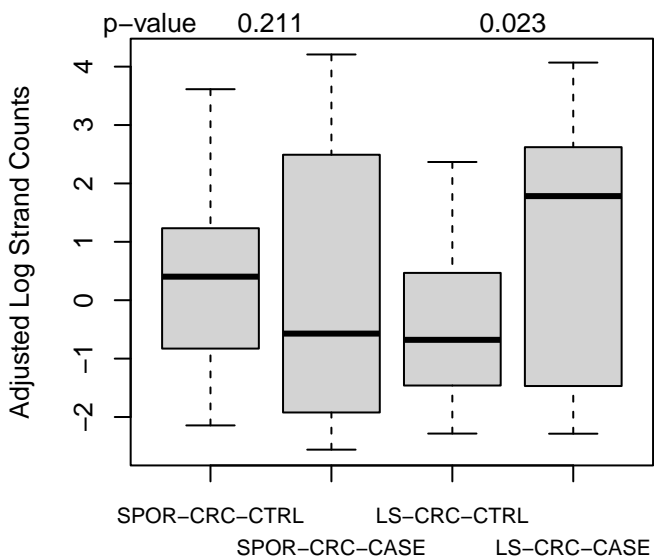

### ELMO1

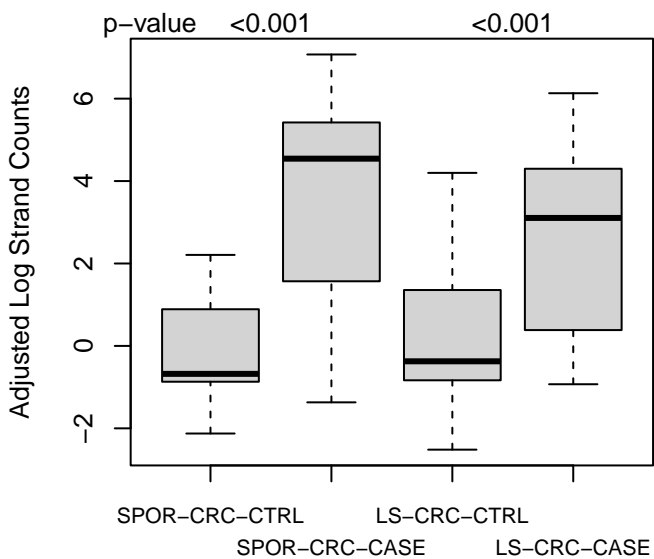

### OPLAH

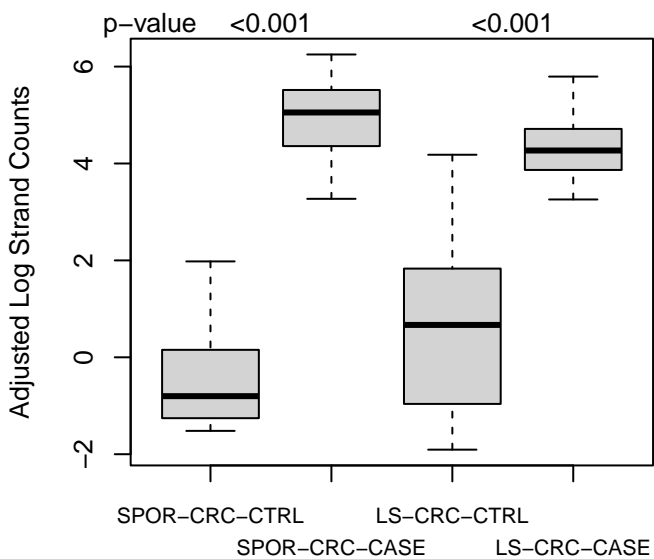

### VAV3

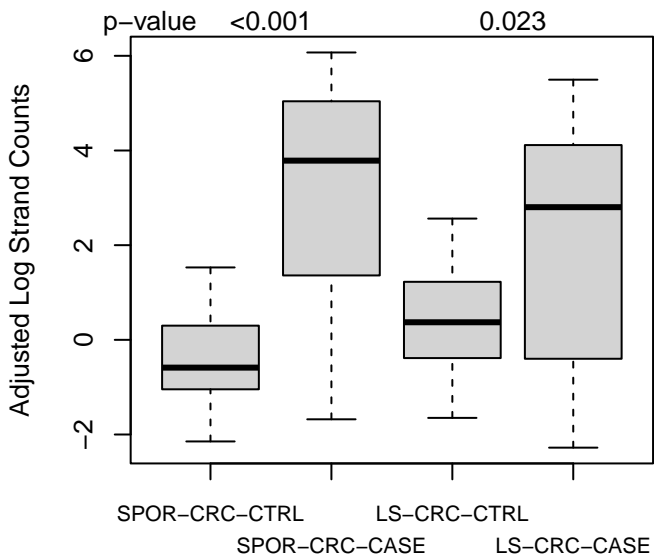

### ARHGEF4

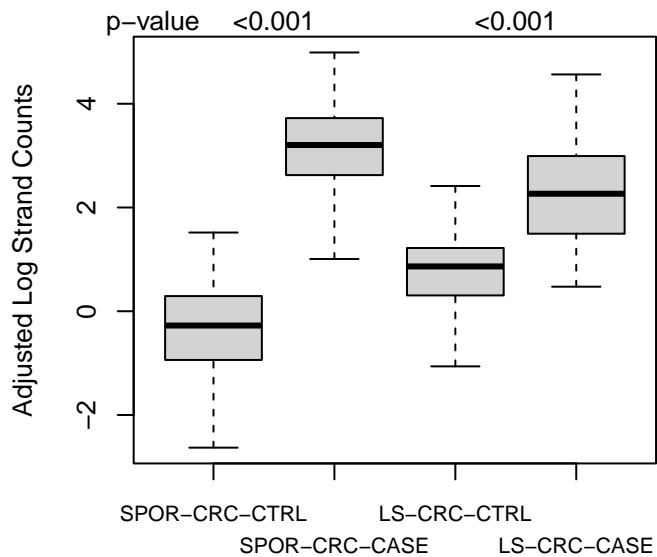

### SFMBT2

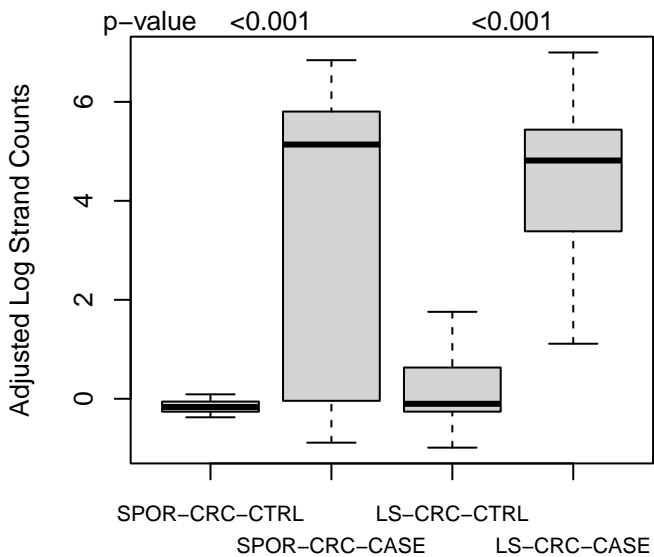

Supplement: NIHMS1931314-supplement-1.pdf [file NIHMS1931314-supplement-1.pdf]
